# Supplementary material
Source: Royal Society of Chemistry journal article supplement (doi:10.1039/d6em00142d)

- ★ Groundwater sample in both HS and S
- ◆ Groundwater sample in S
- PADEP sample
- SN sample
- - - 1km buffer zone
- Spill treatment area (3km)

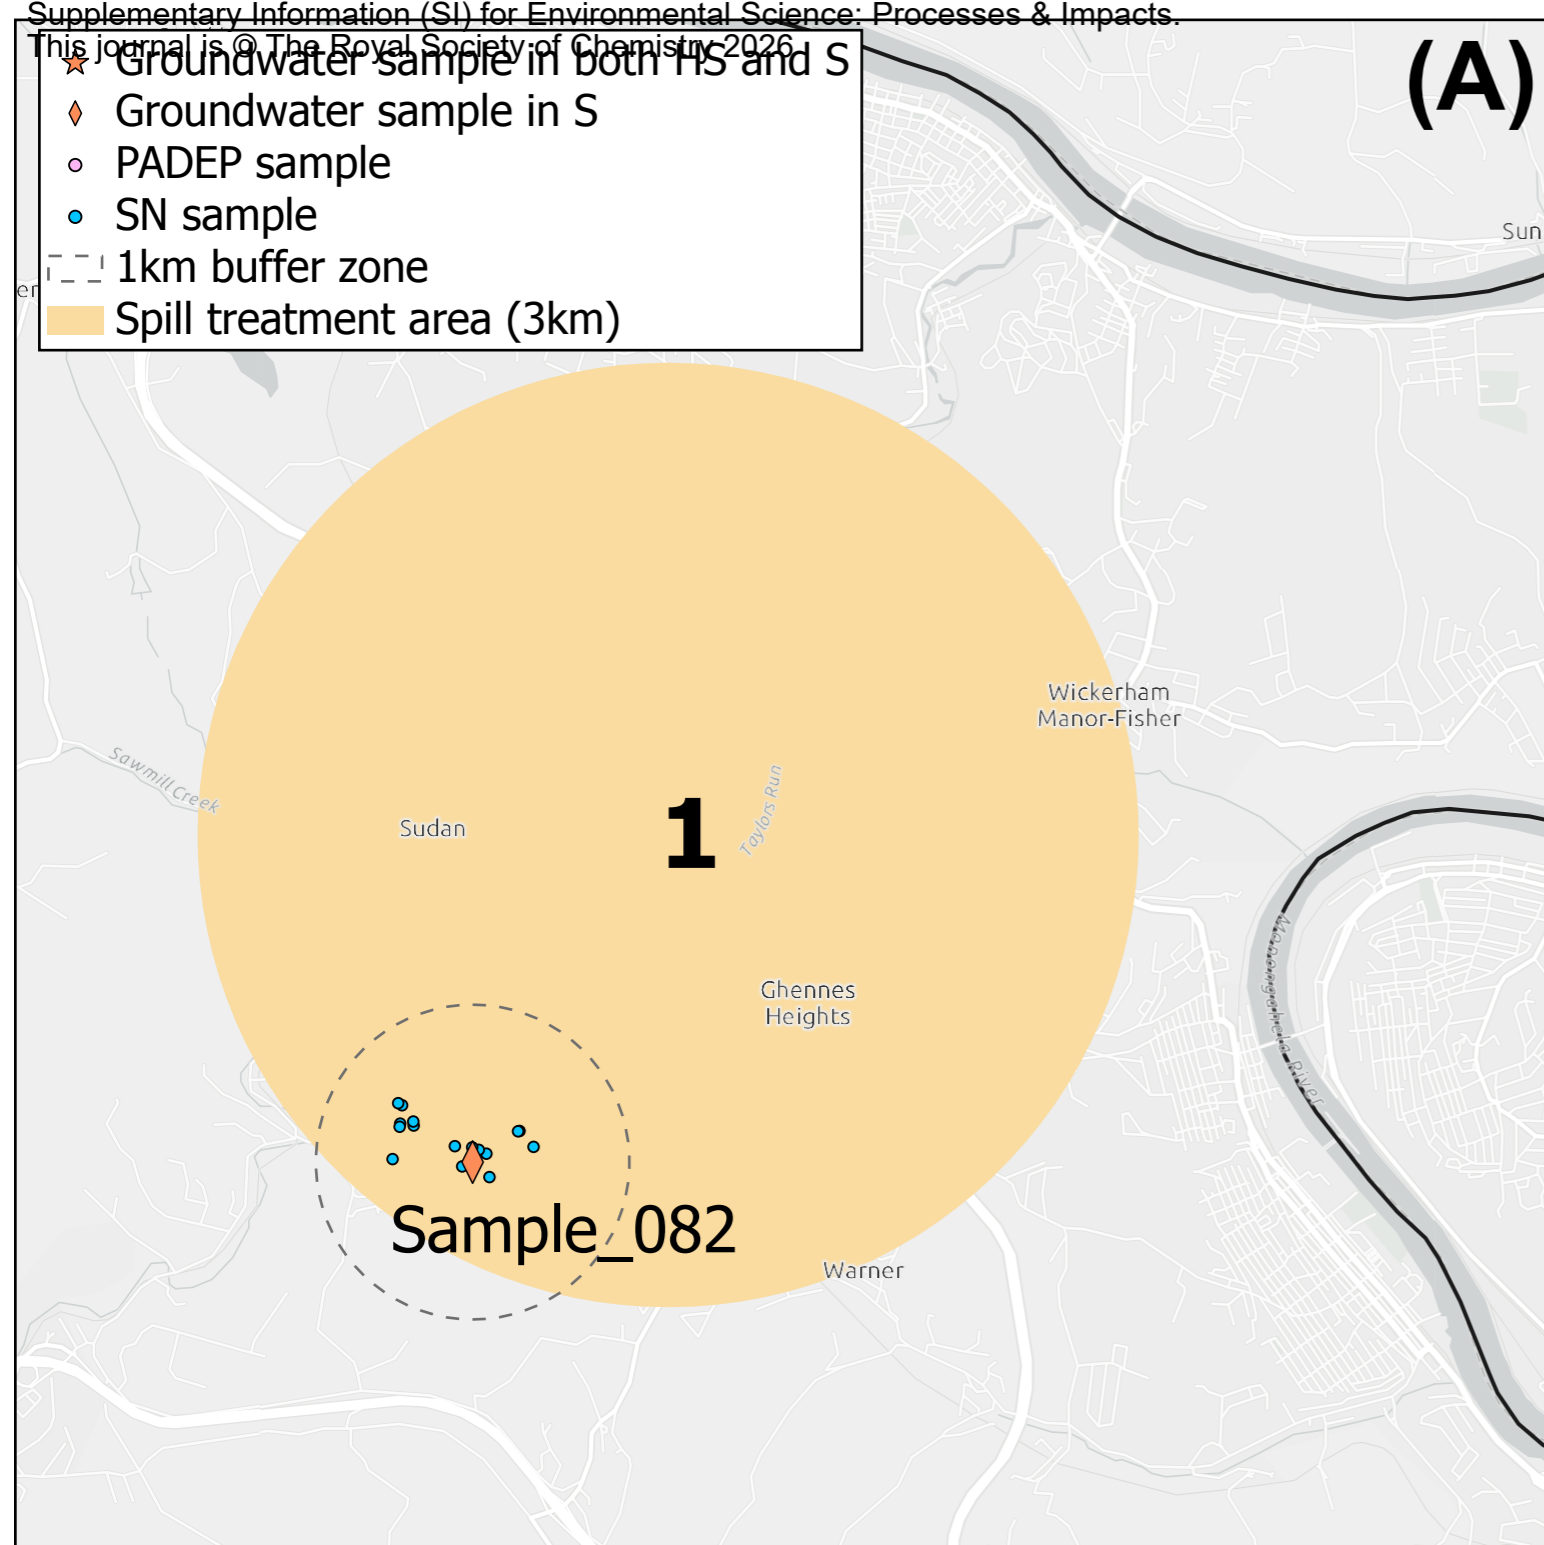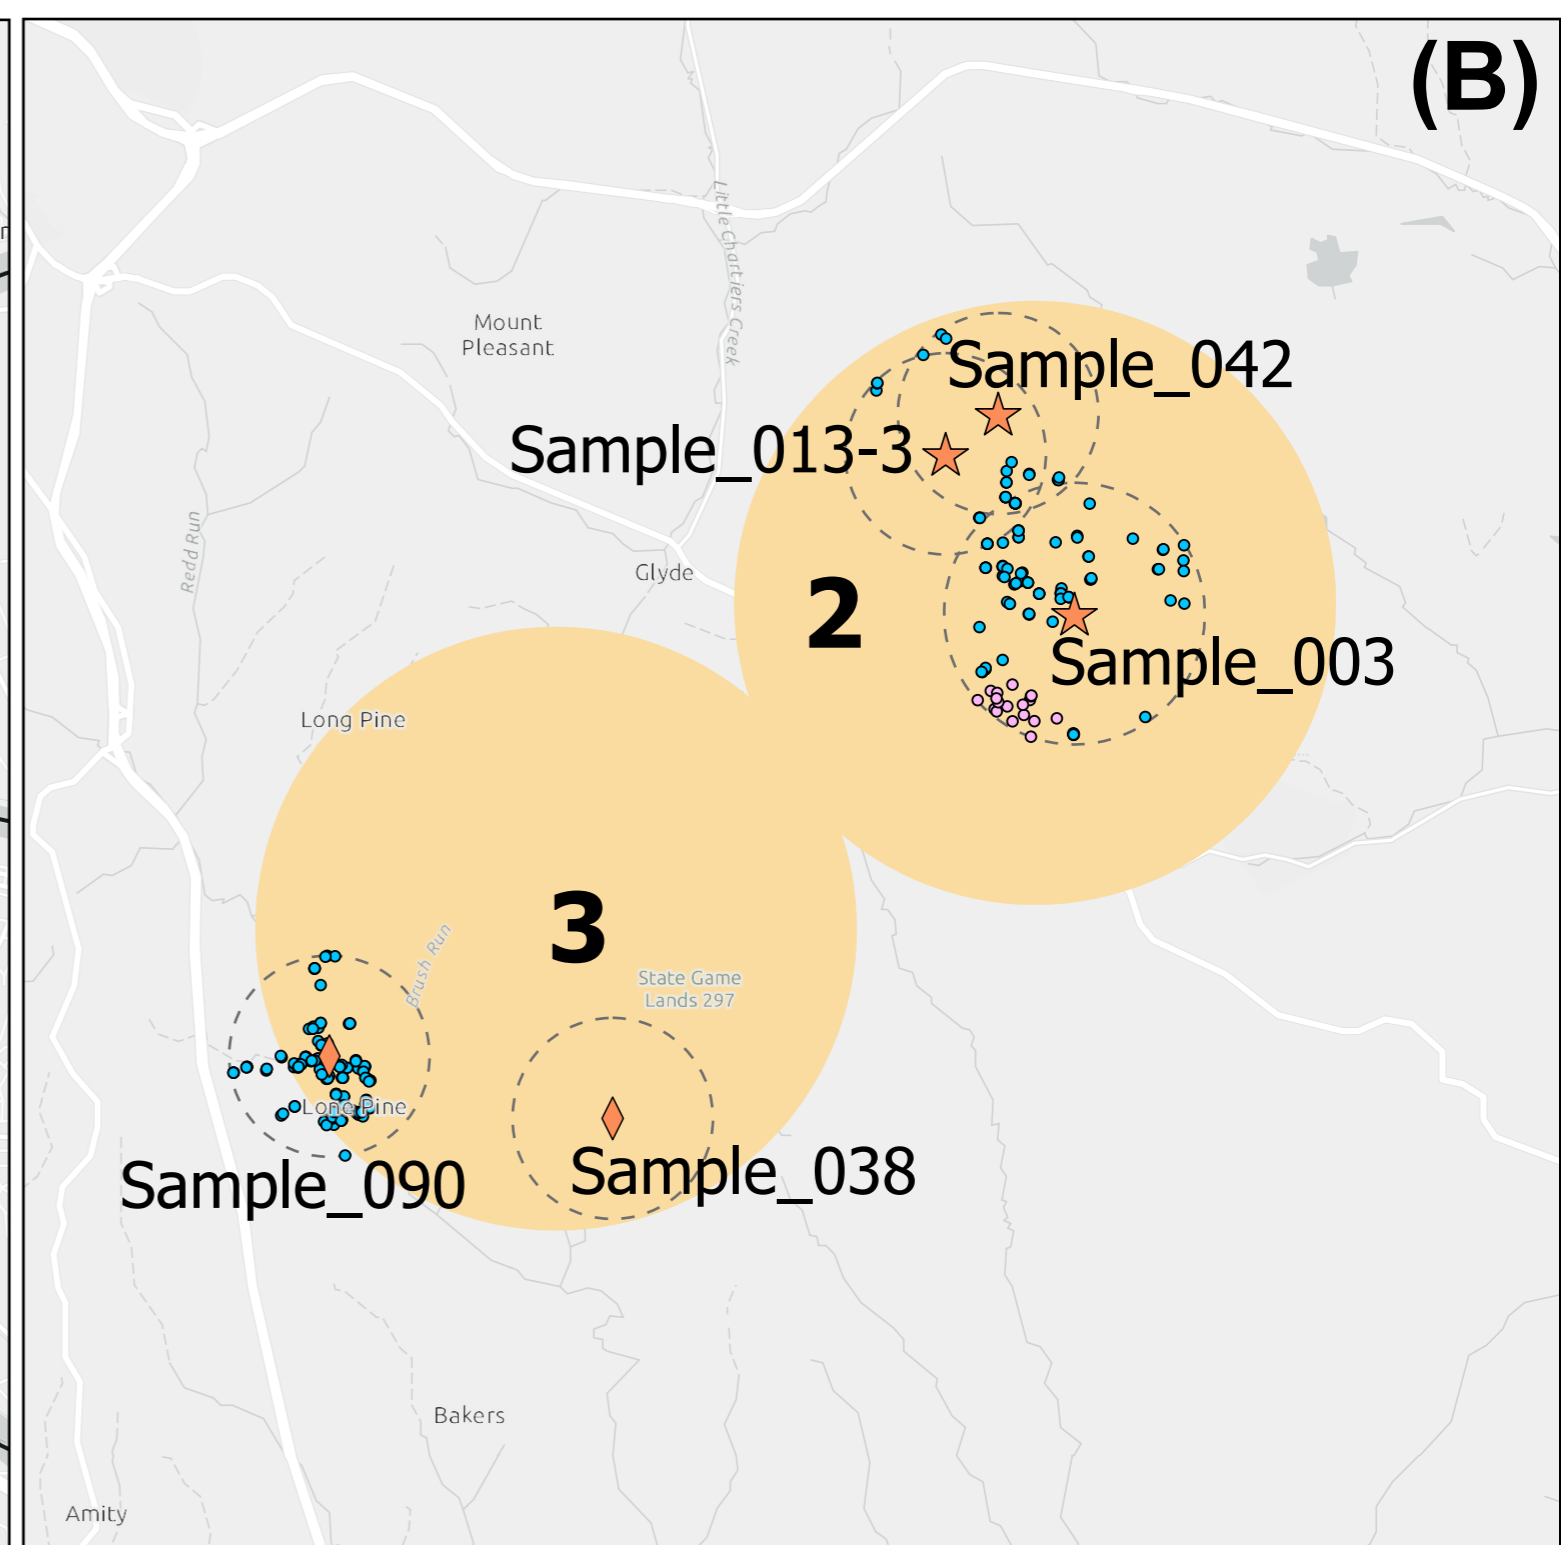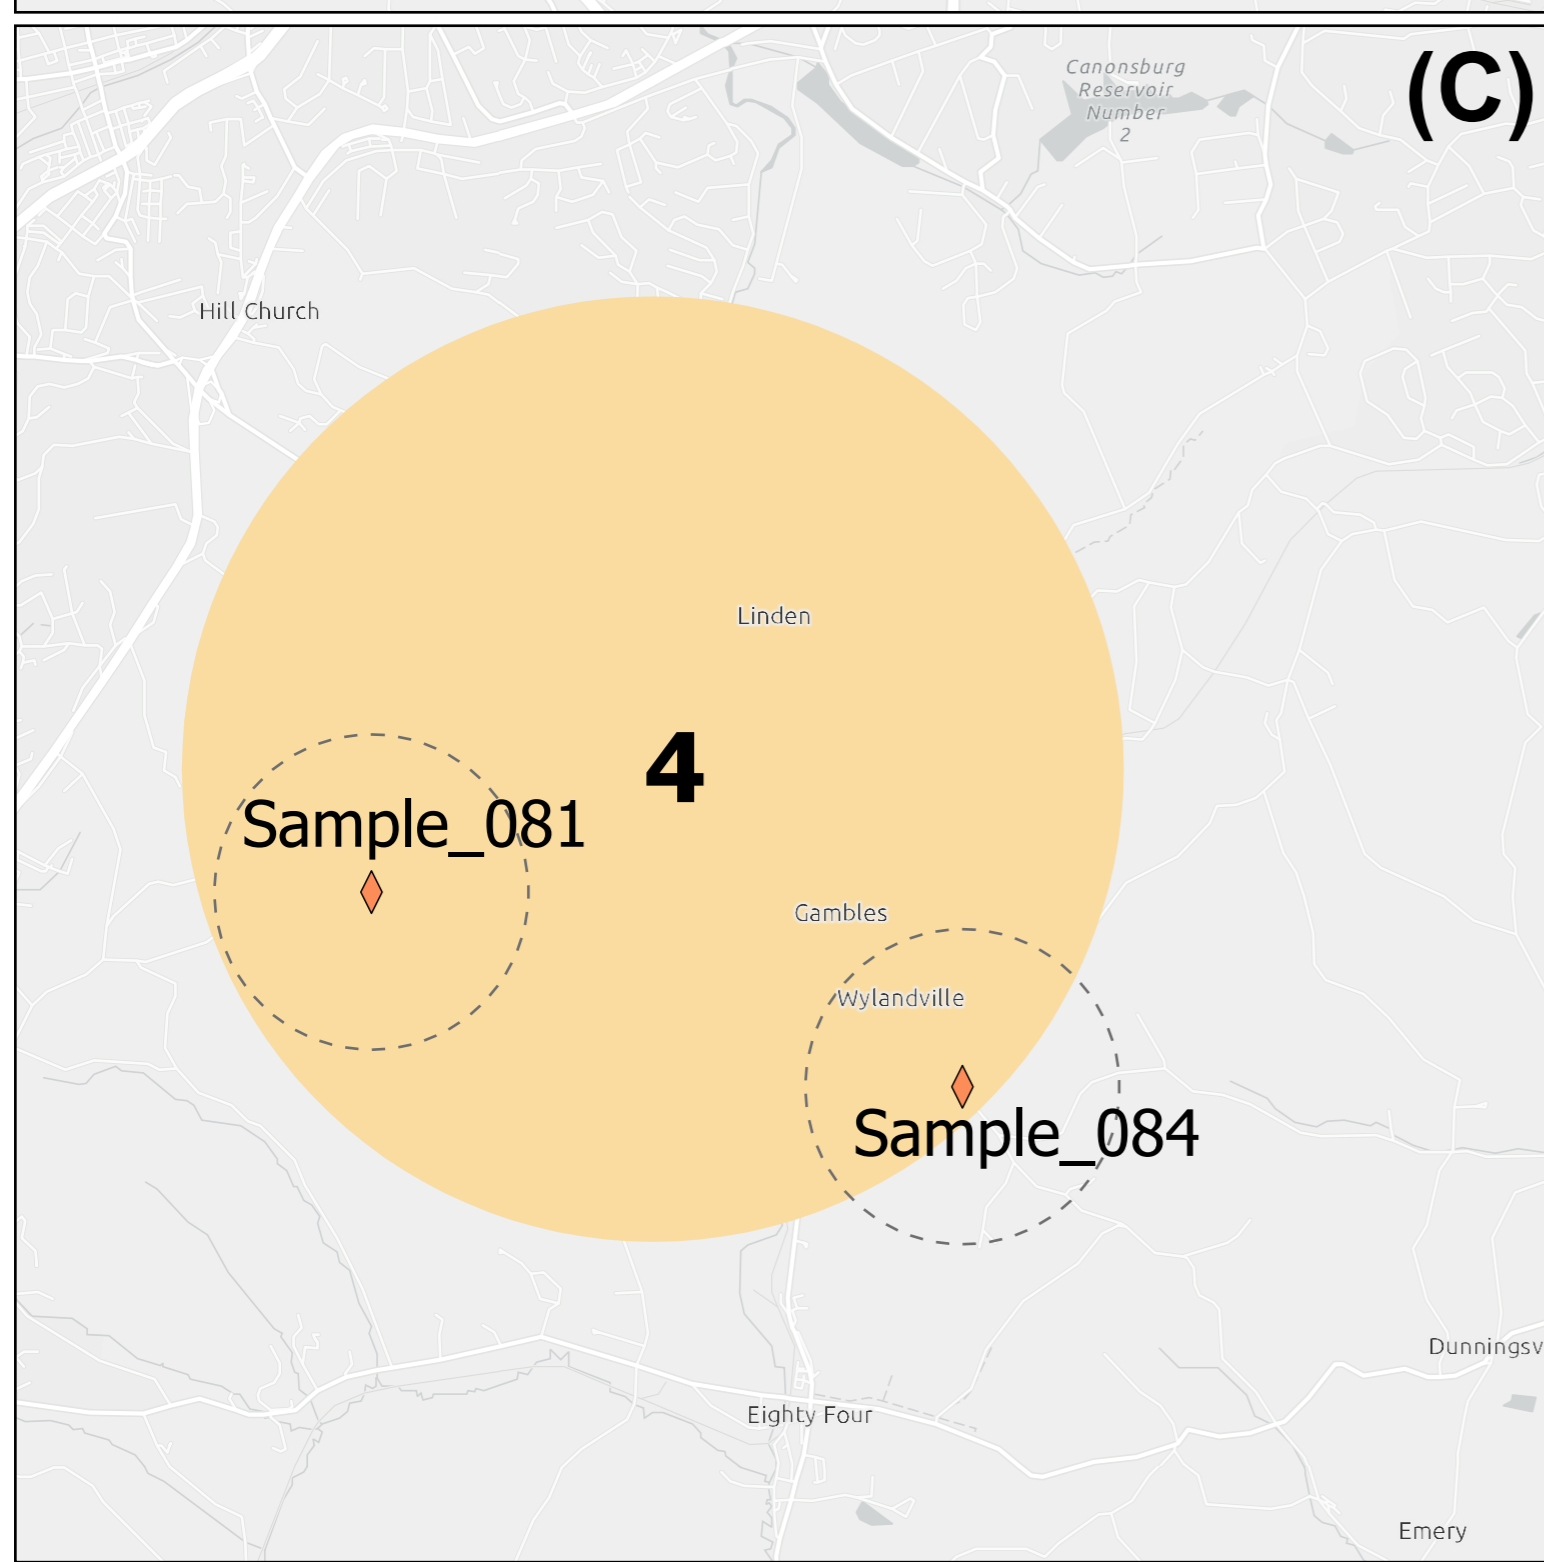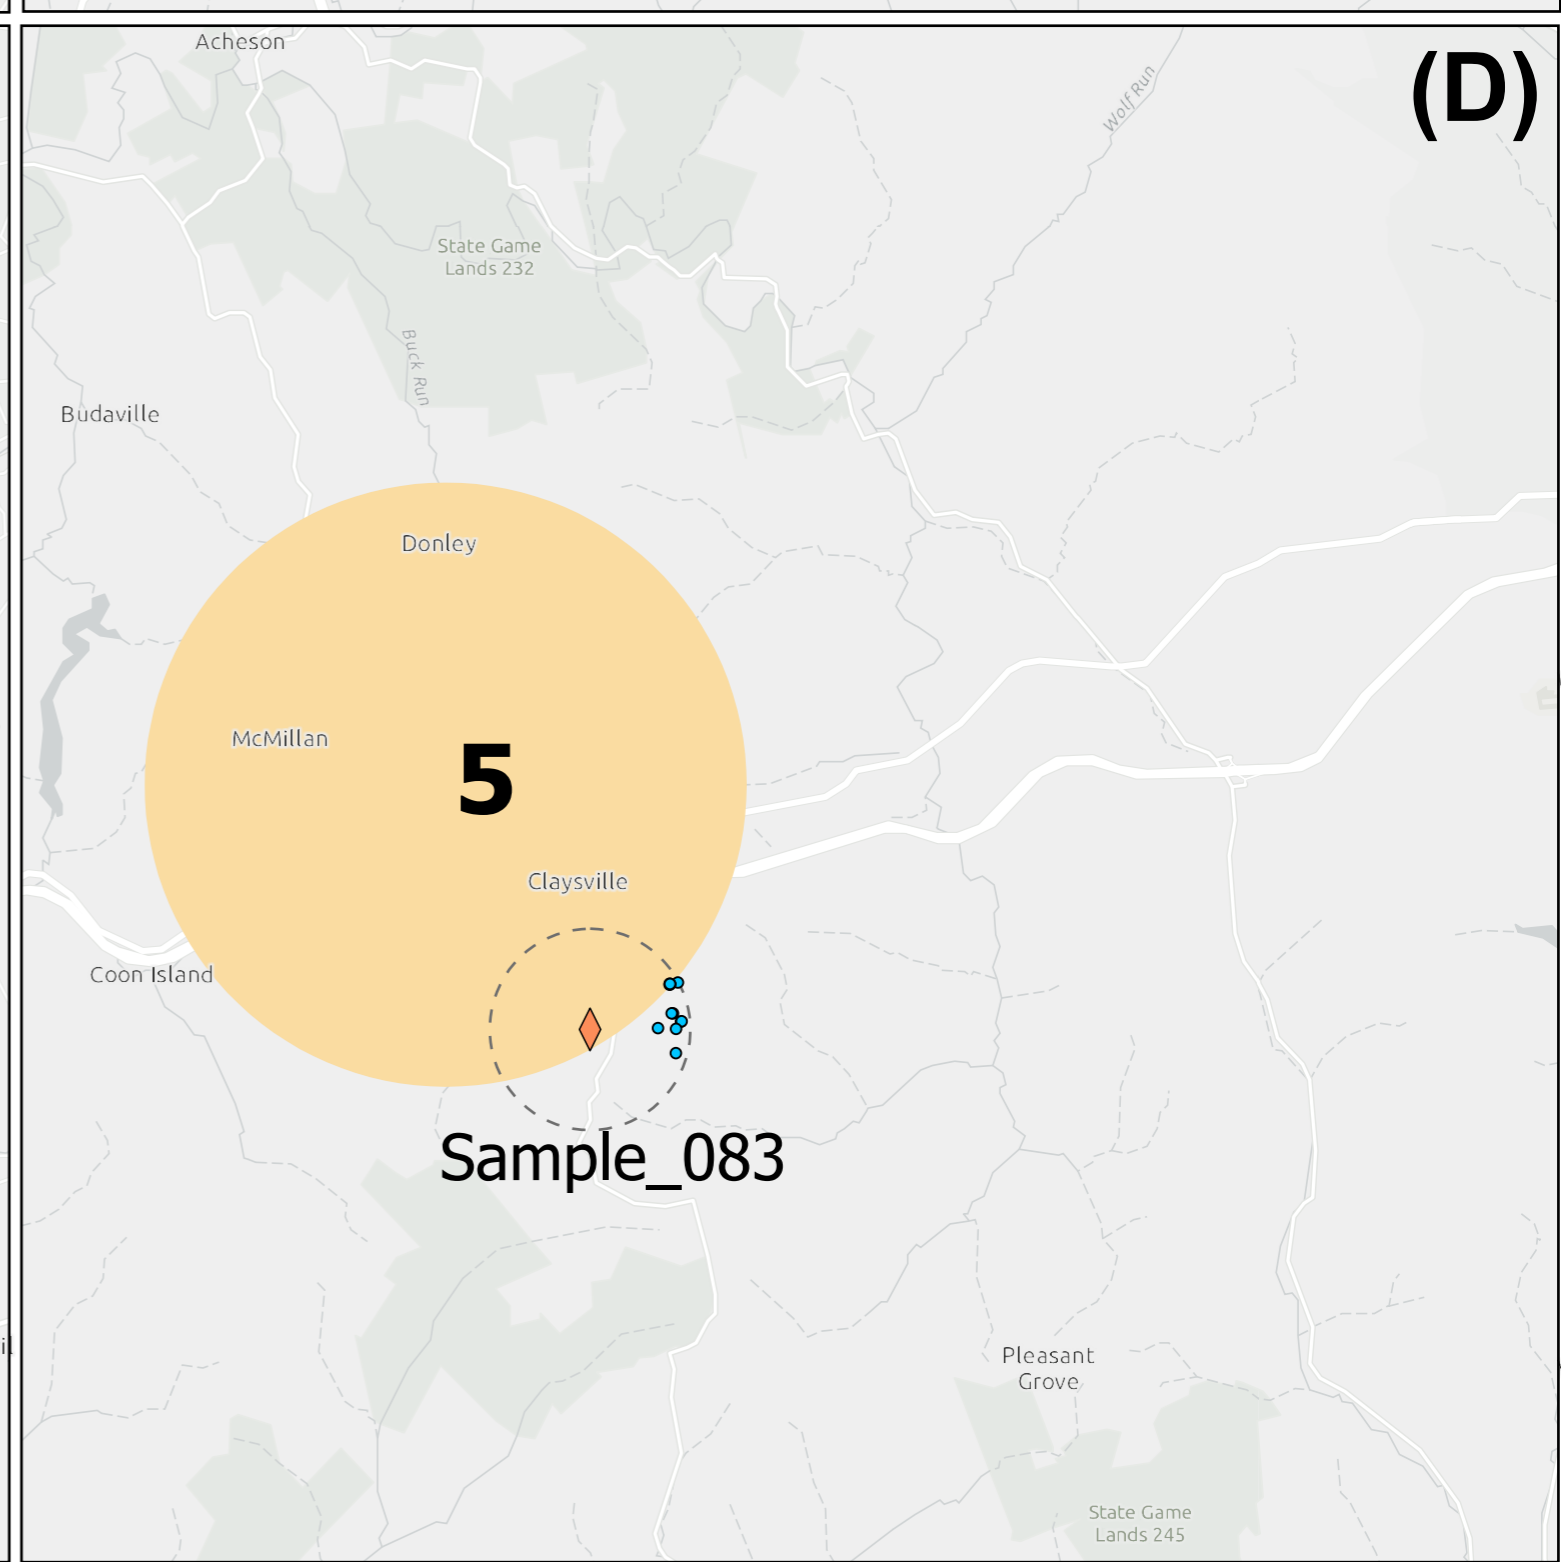

Supplement: d6em00142d2.pdf [file d6em00142d2.pdf]
