# Supplementary material
Source: Royal Society of Chemistry journal article supplement (doi:10.1039/d6em00142d)

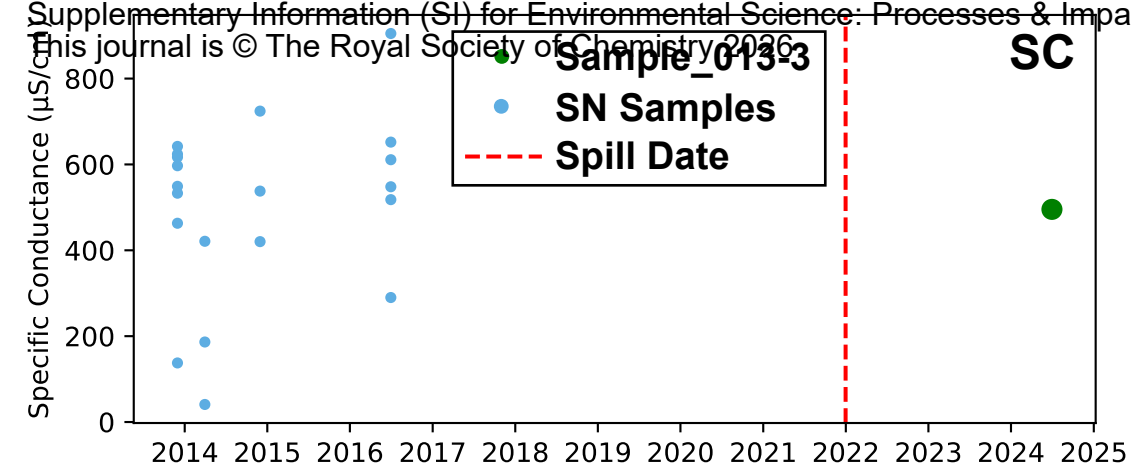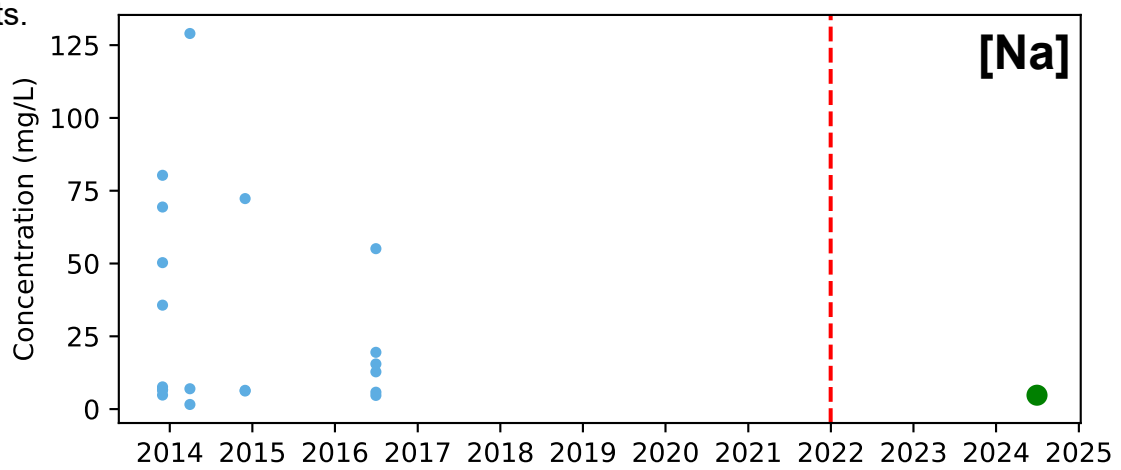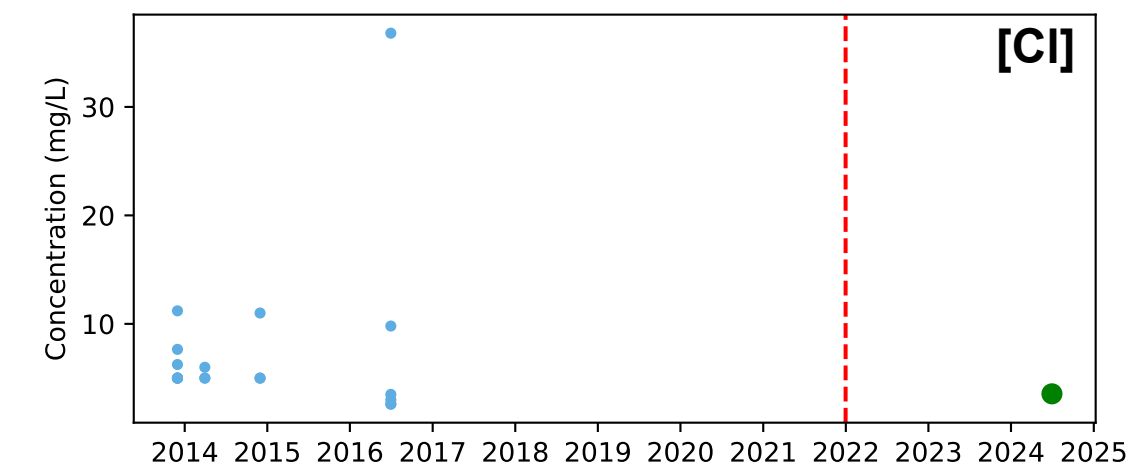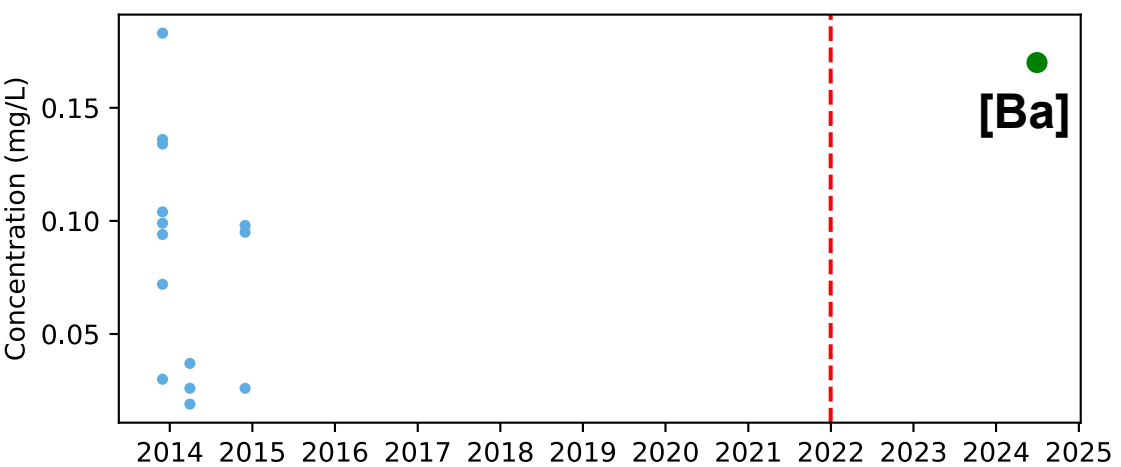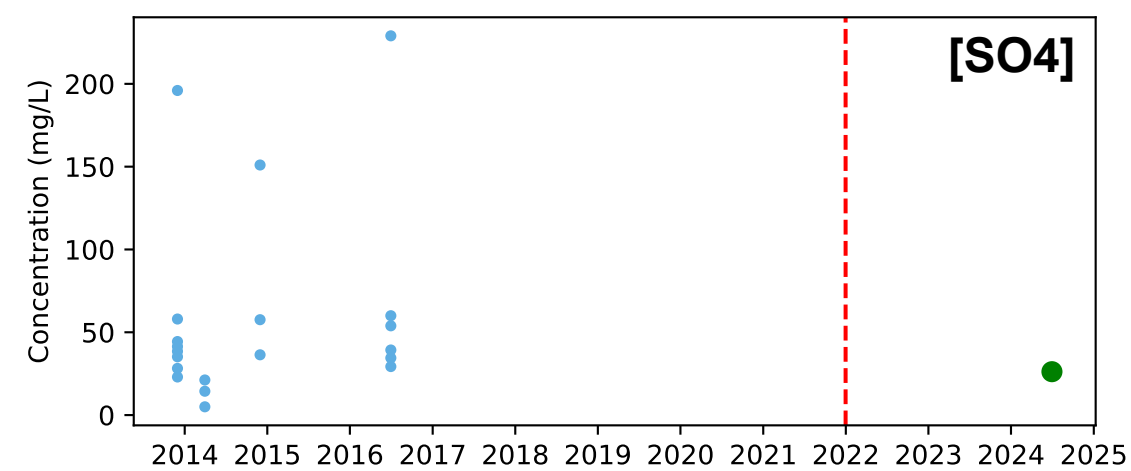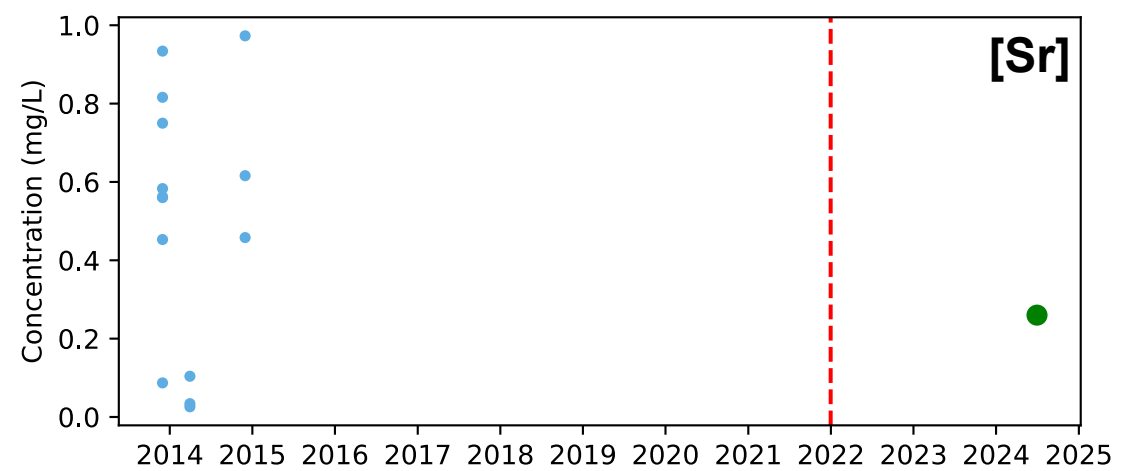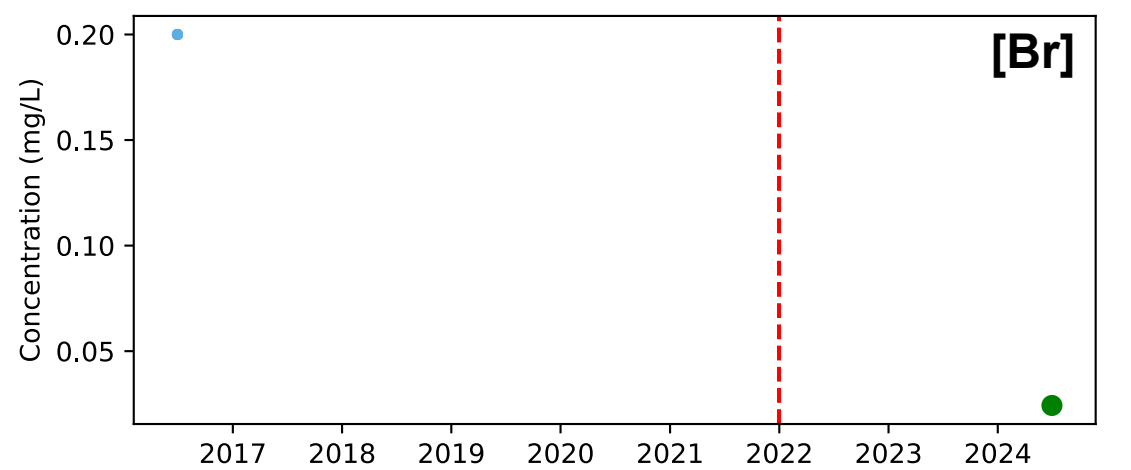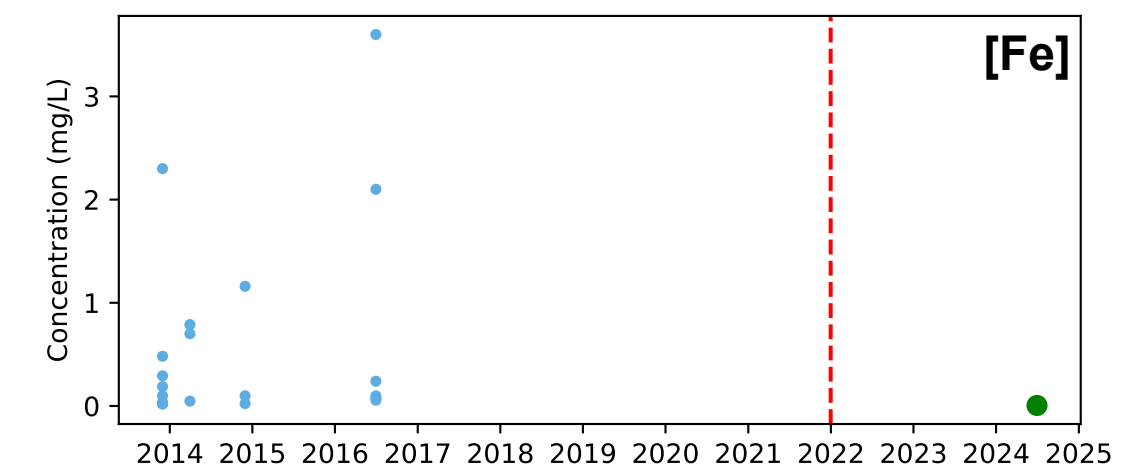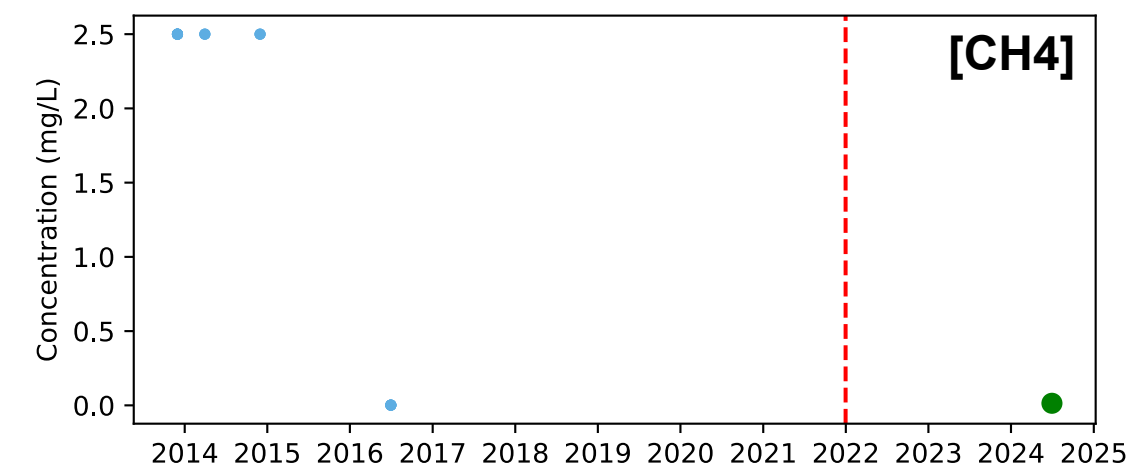

Supplement: d6em00142d3.pdf [file d6em00142d3.pdf]

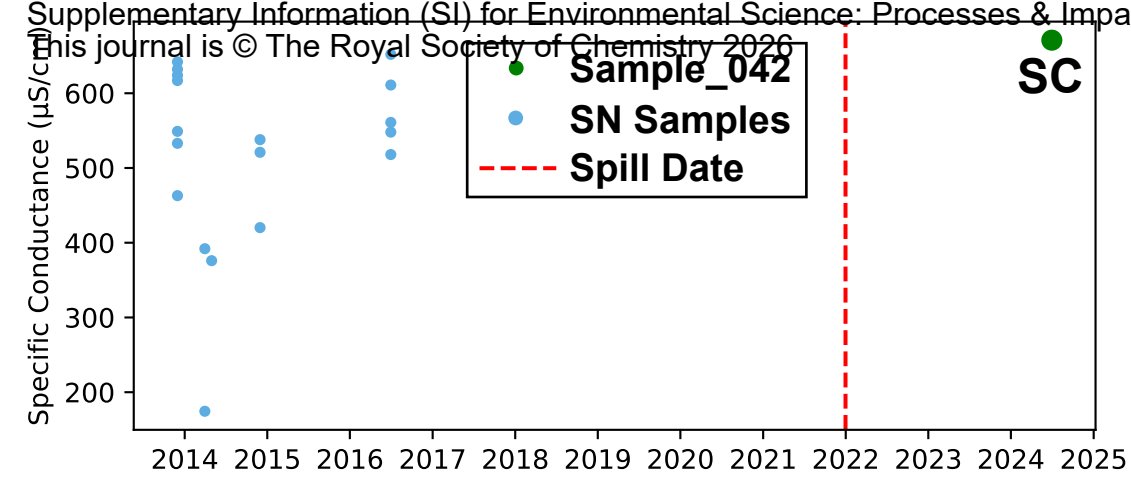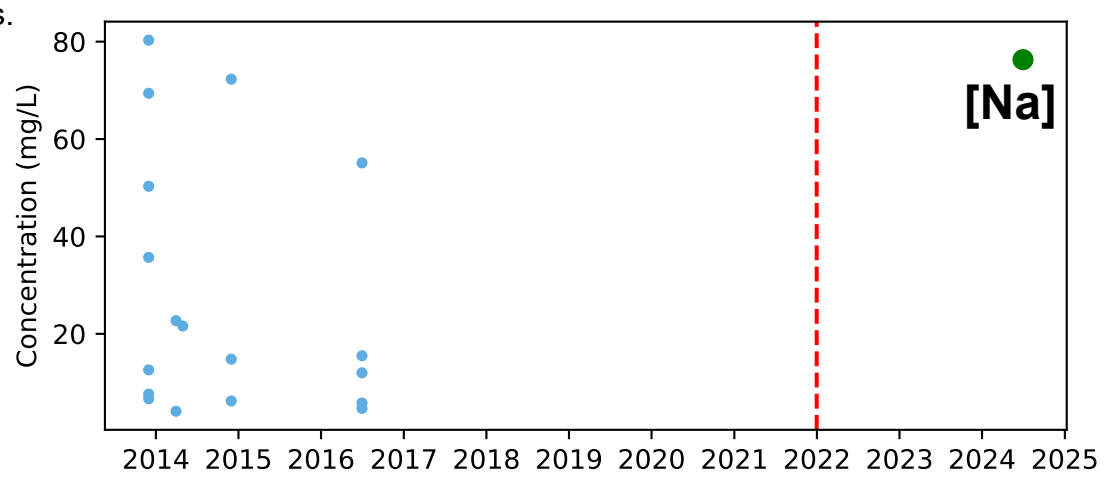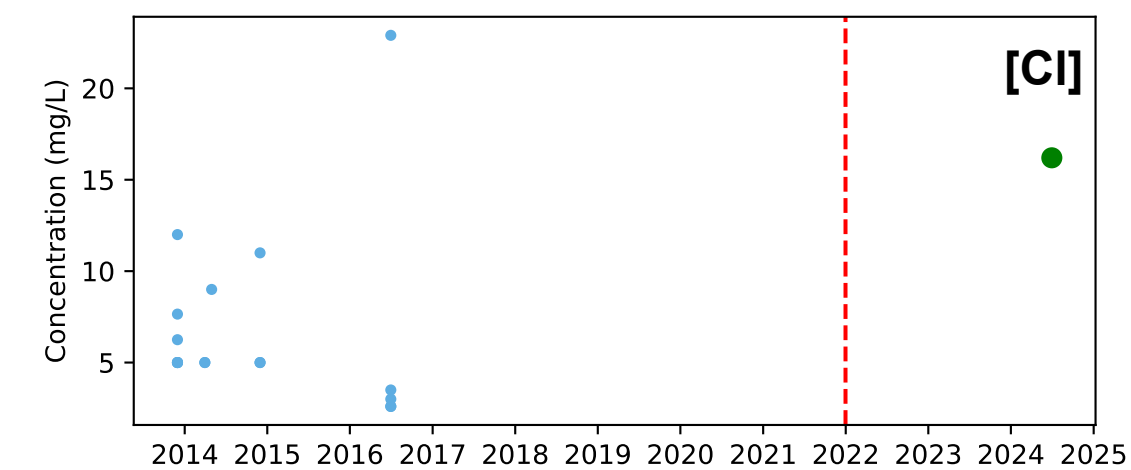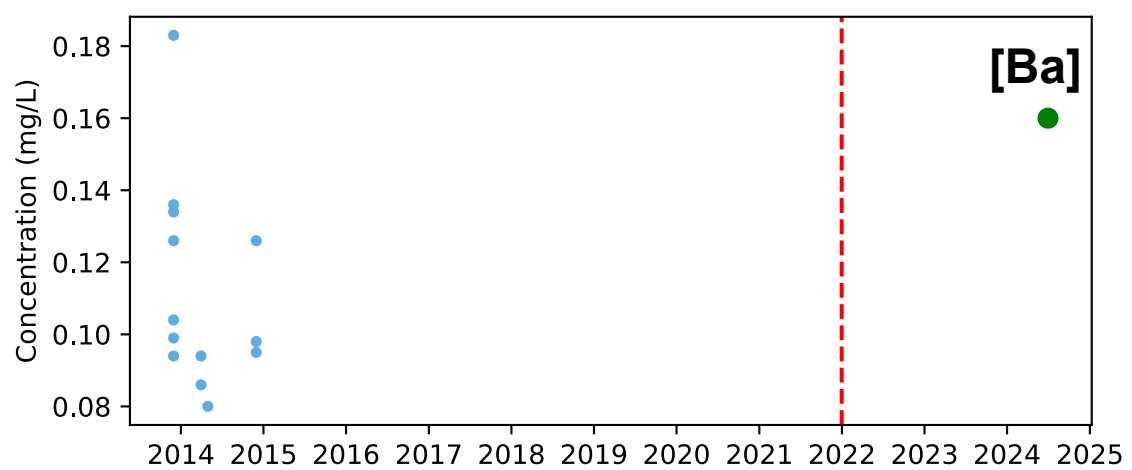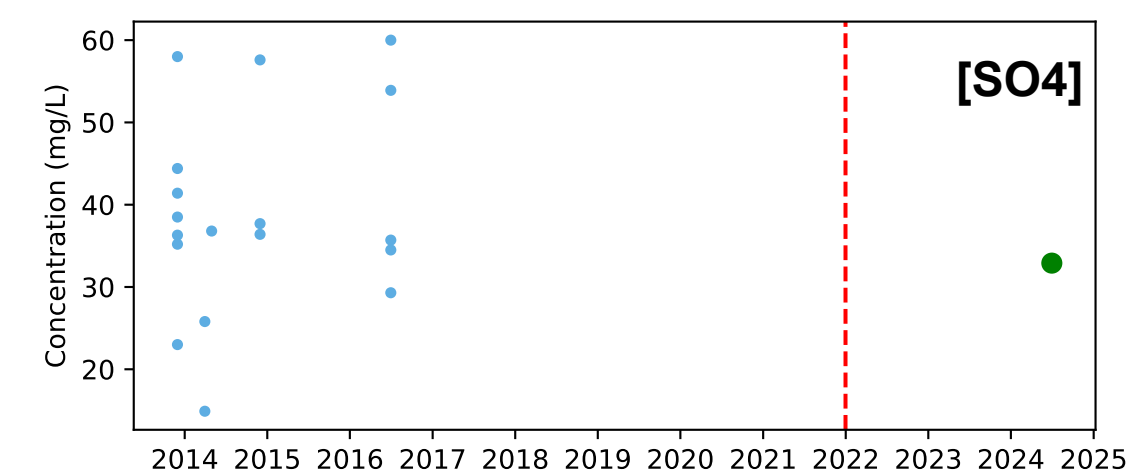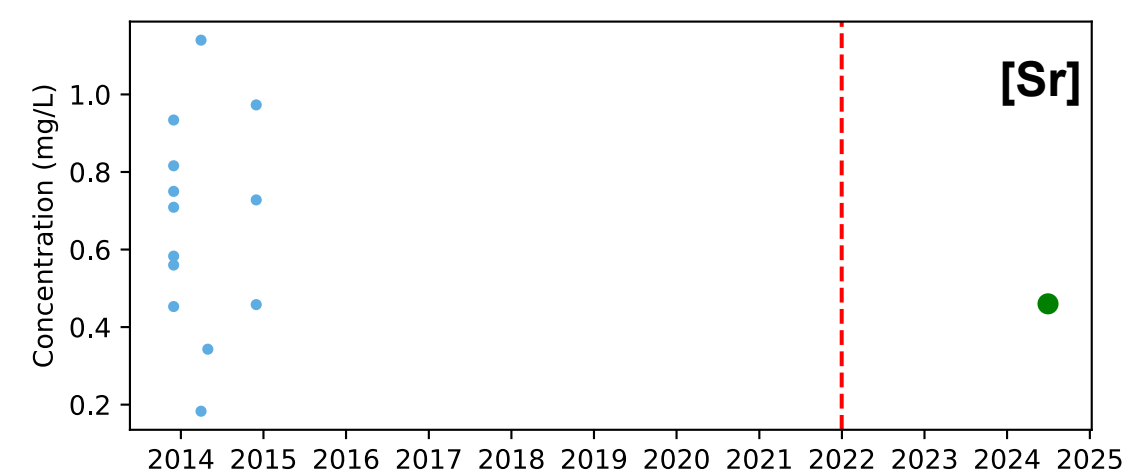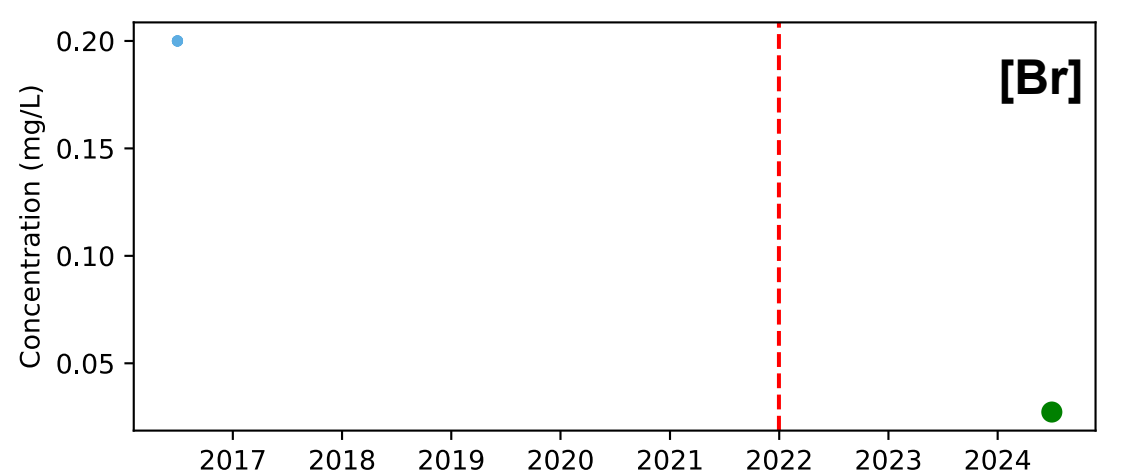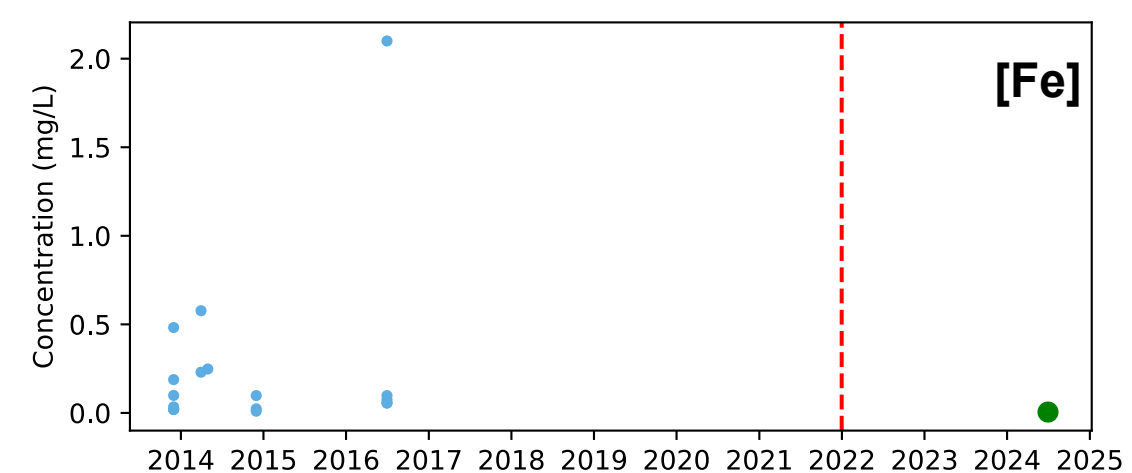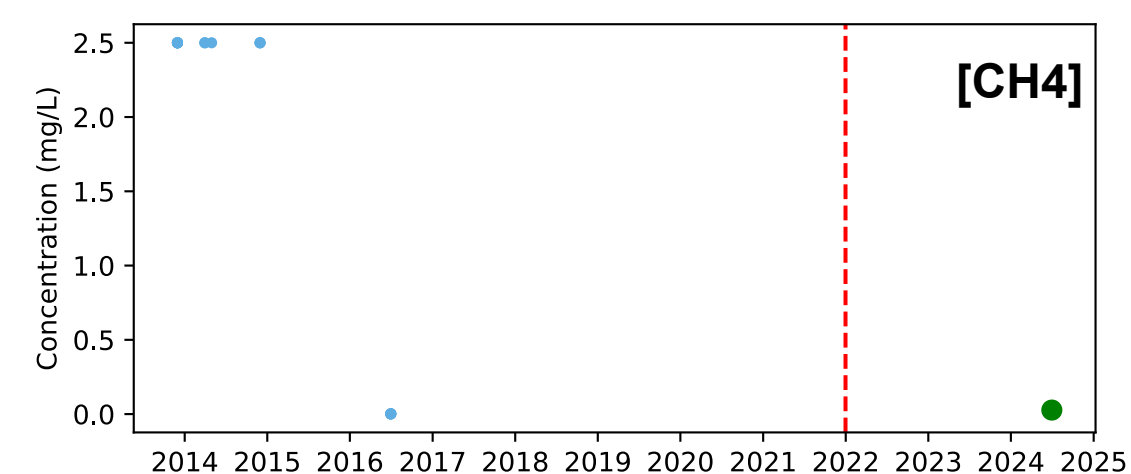

Supplement: d6em00142d4.pdf [file d6em00142d4.pdf]

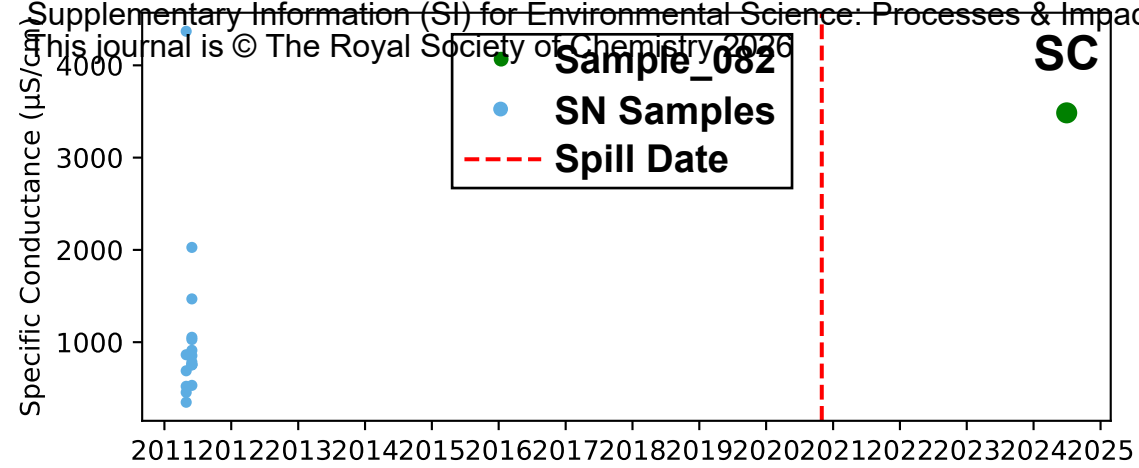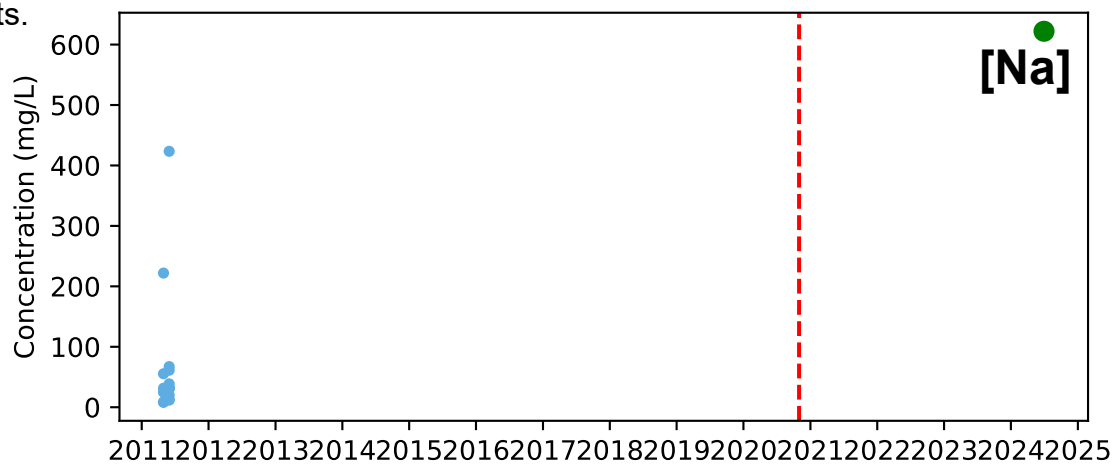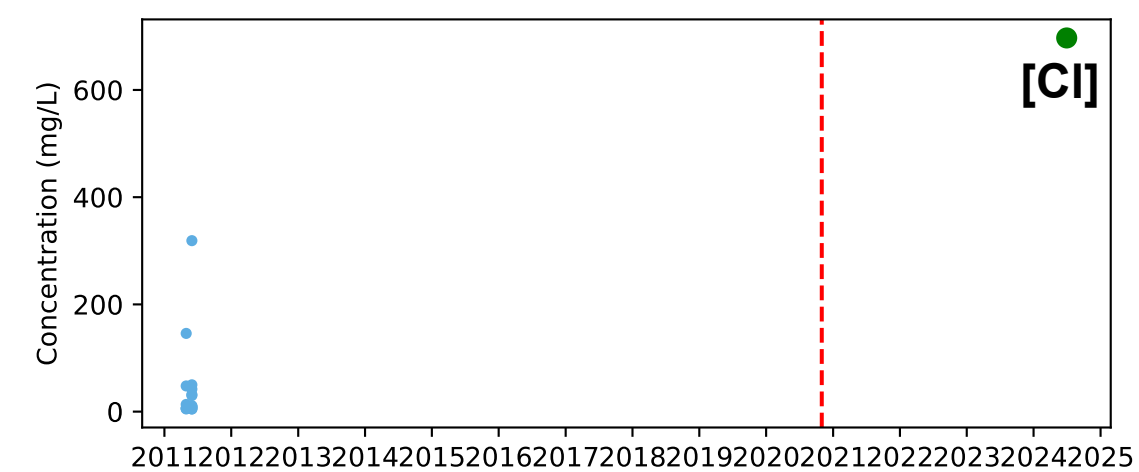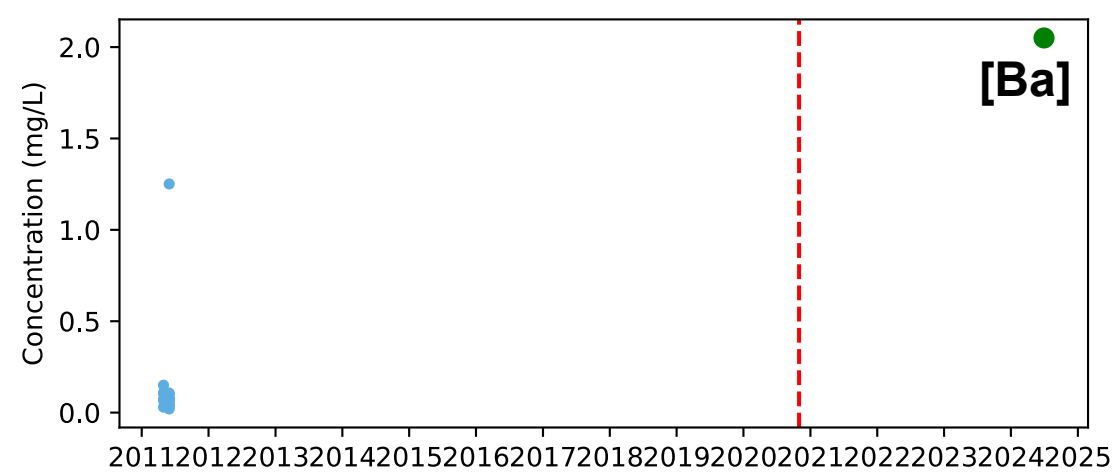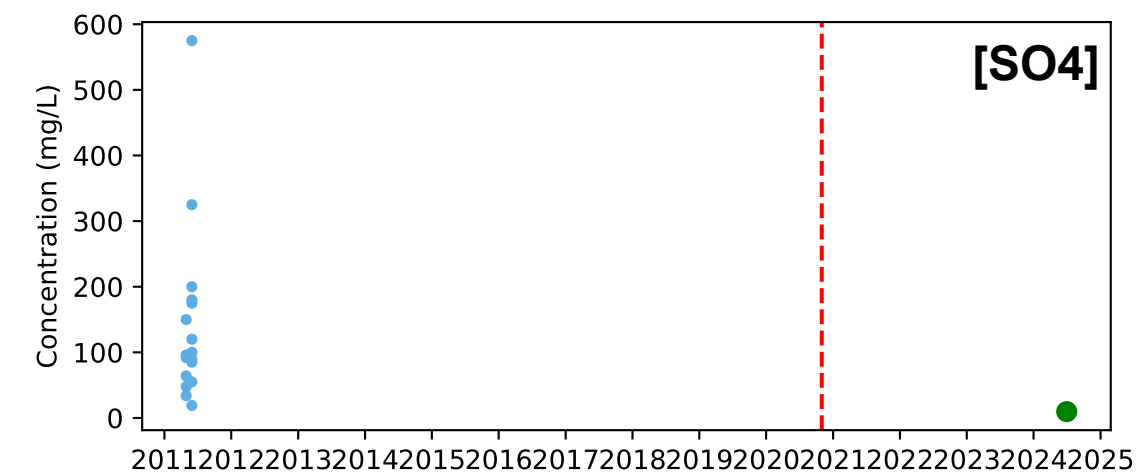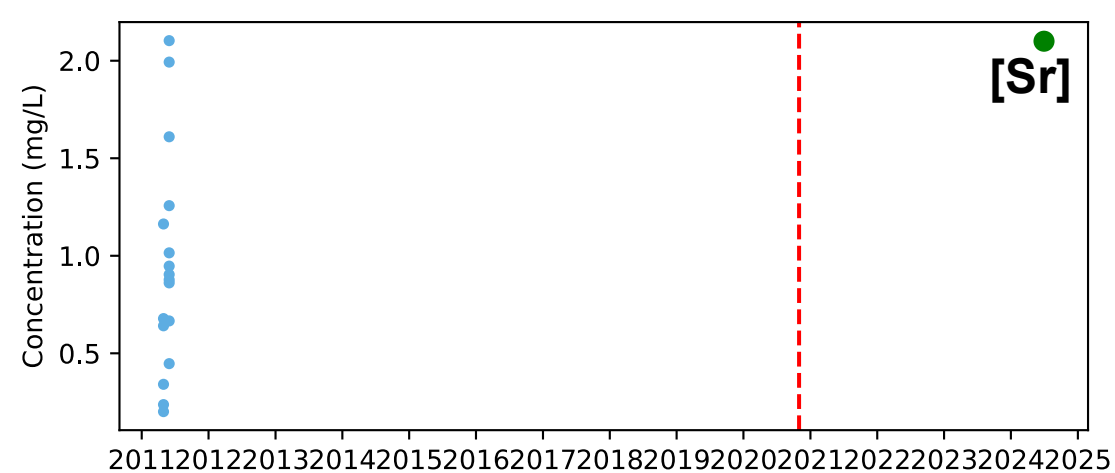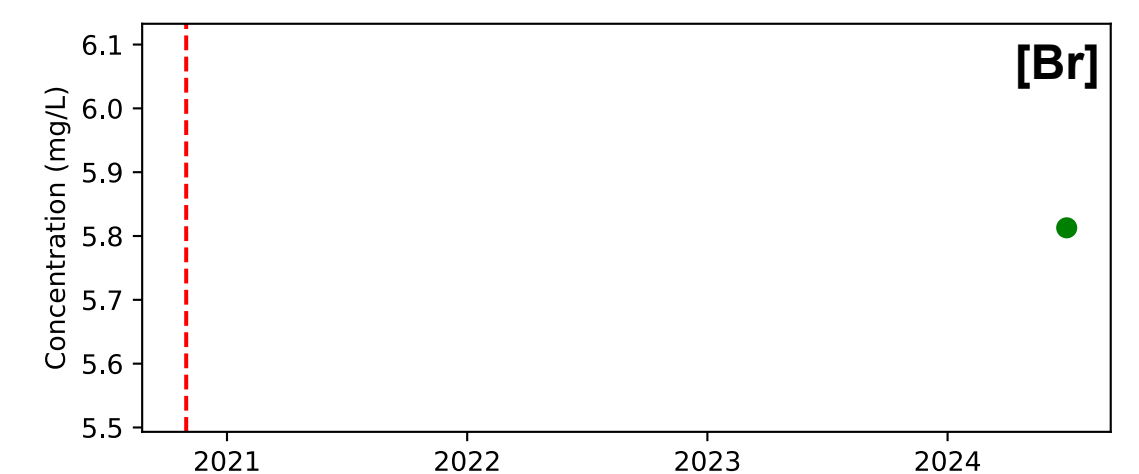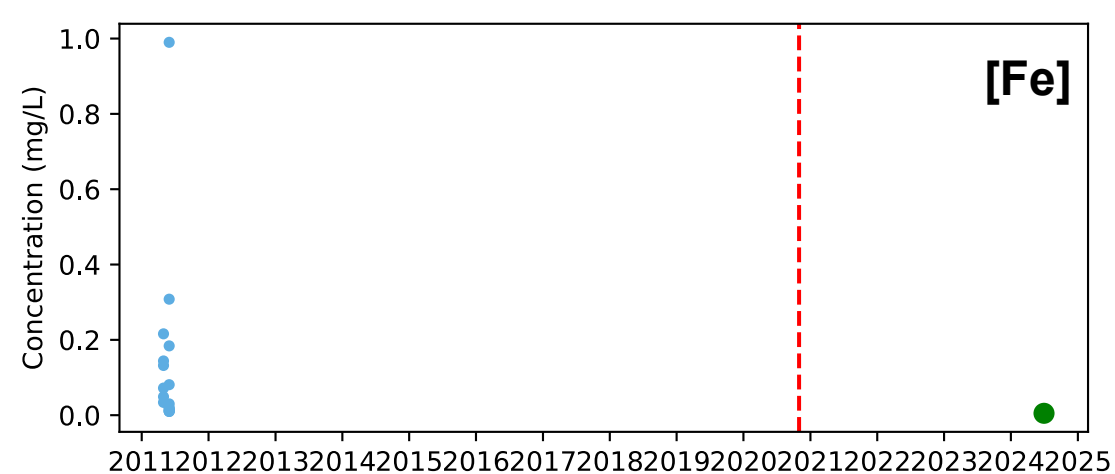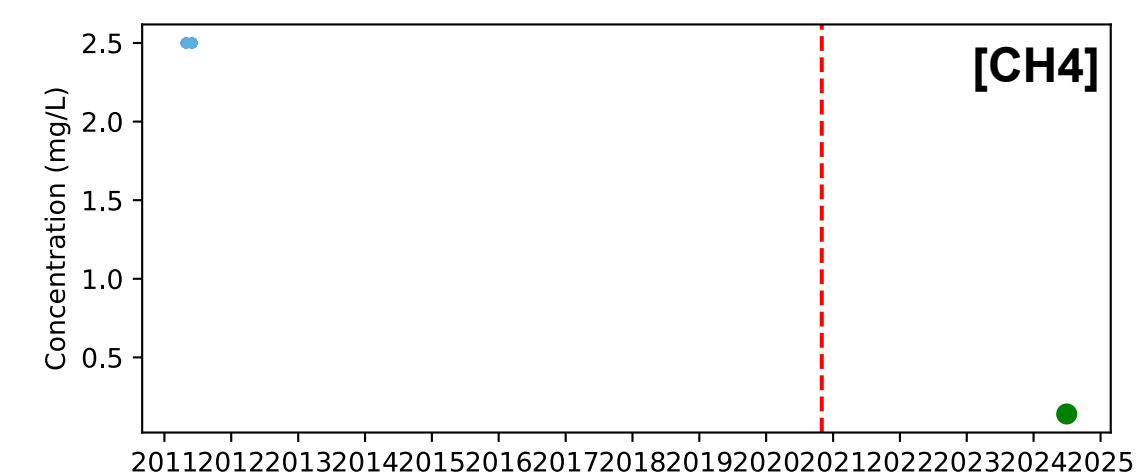

Supplement: d6em00142d5.pdf [file d6em00142d5.pdf]

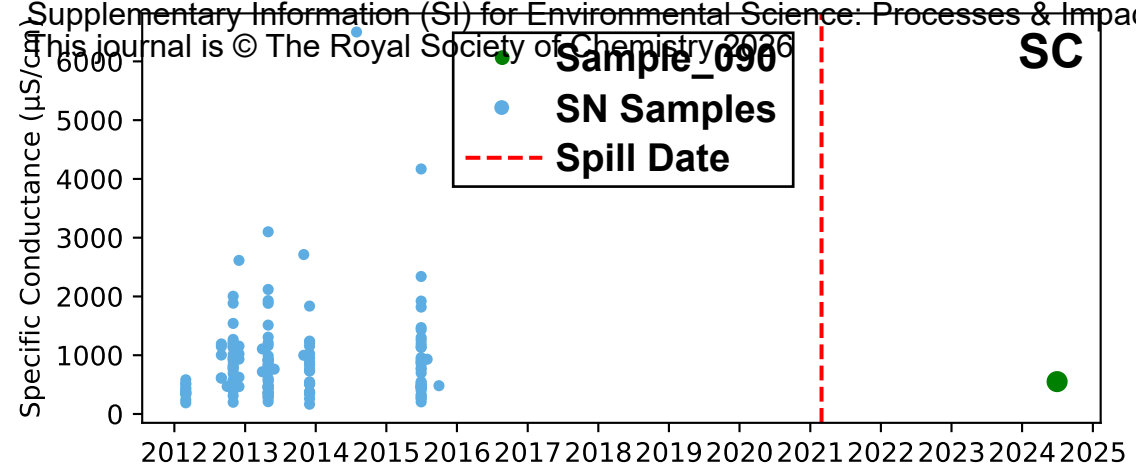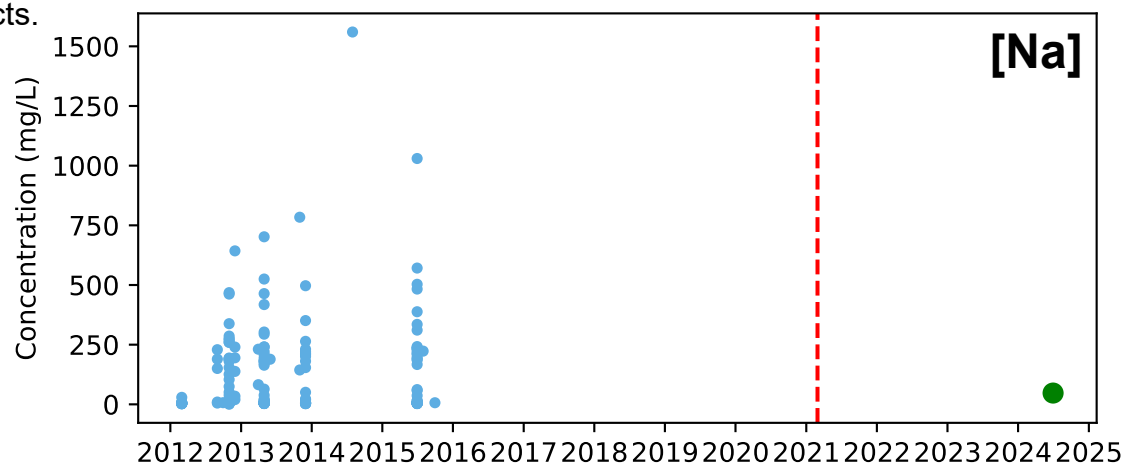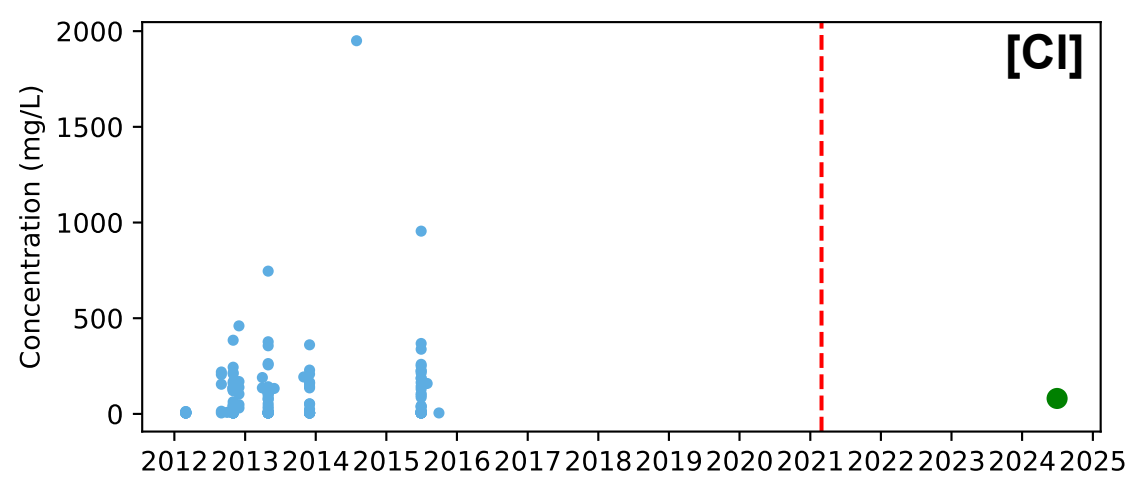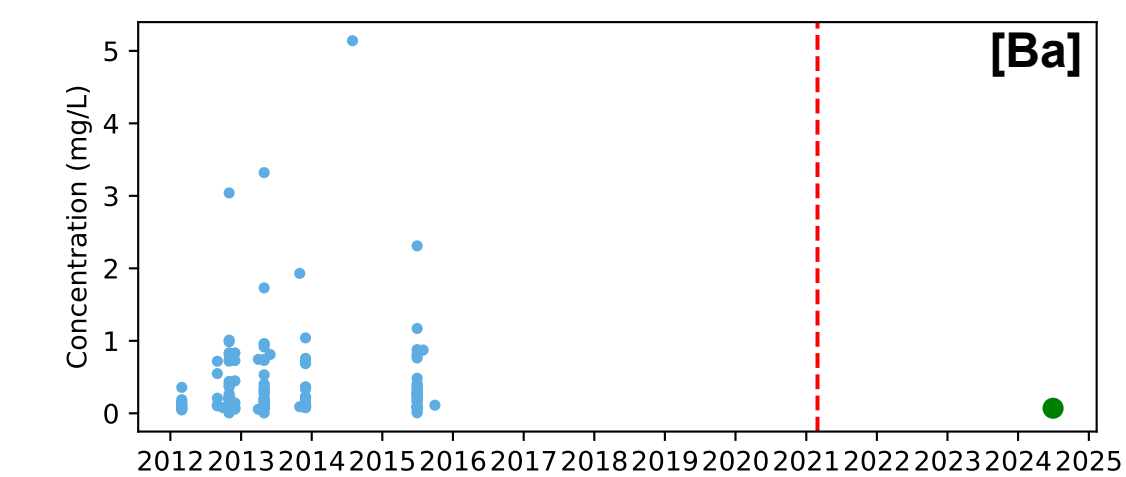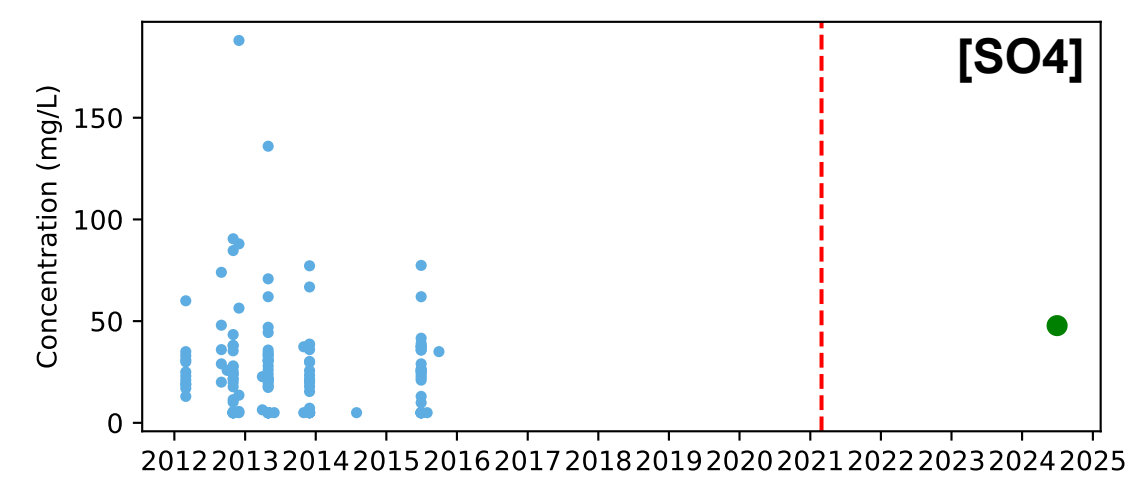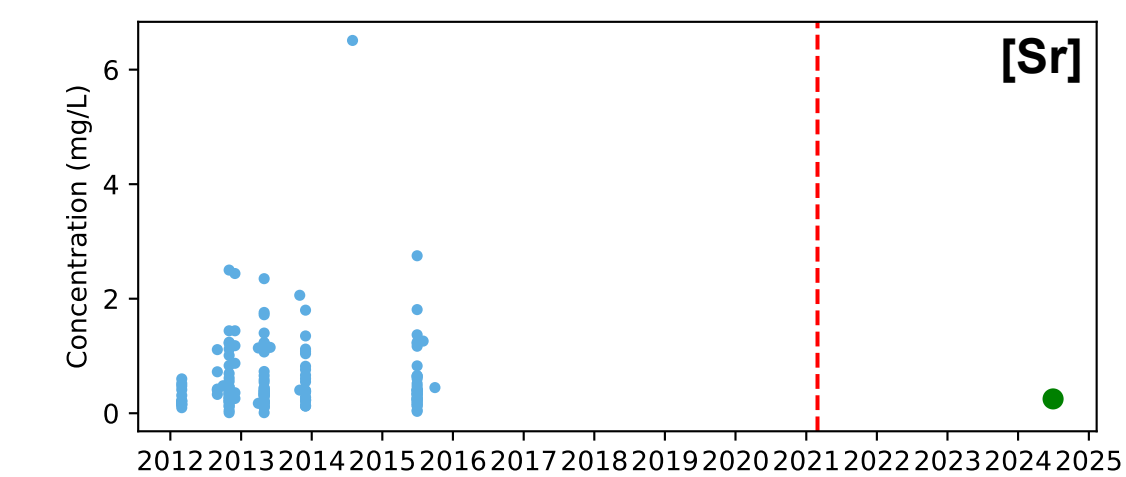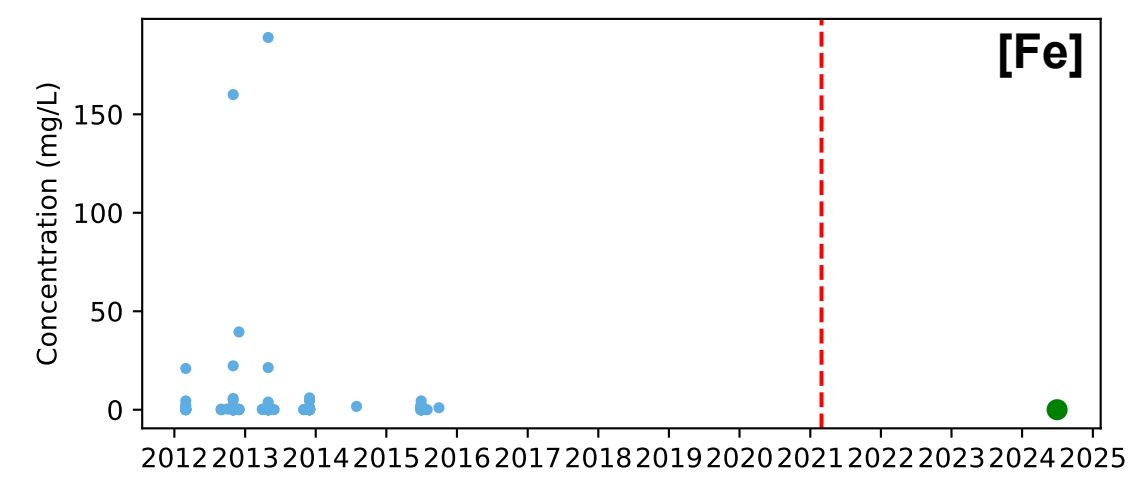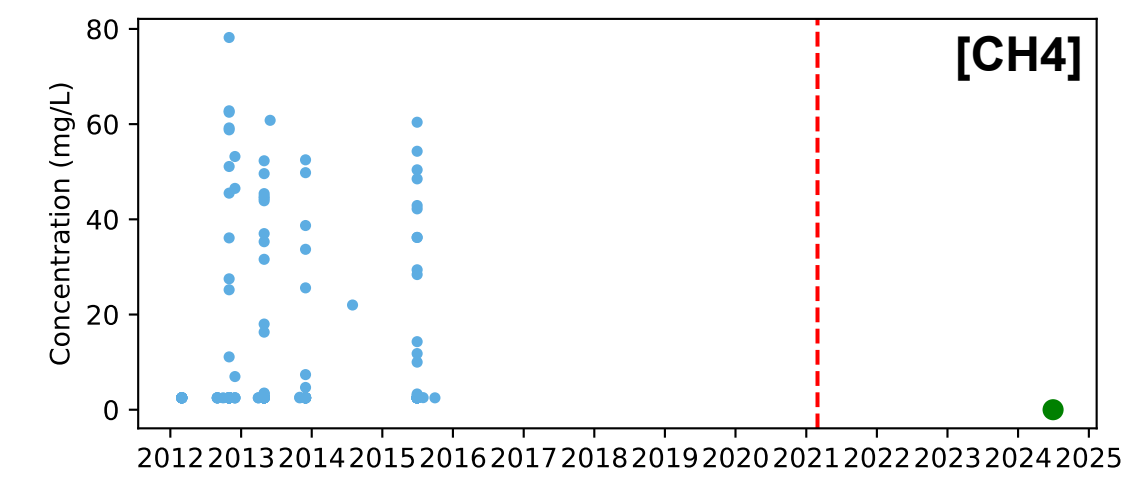

Supplement: d6em00142d6.pdf [file d6em00142d6.pdf]

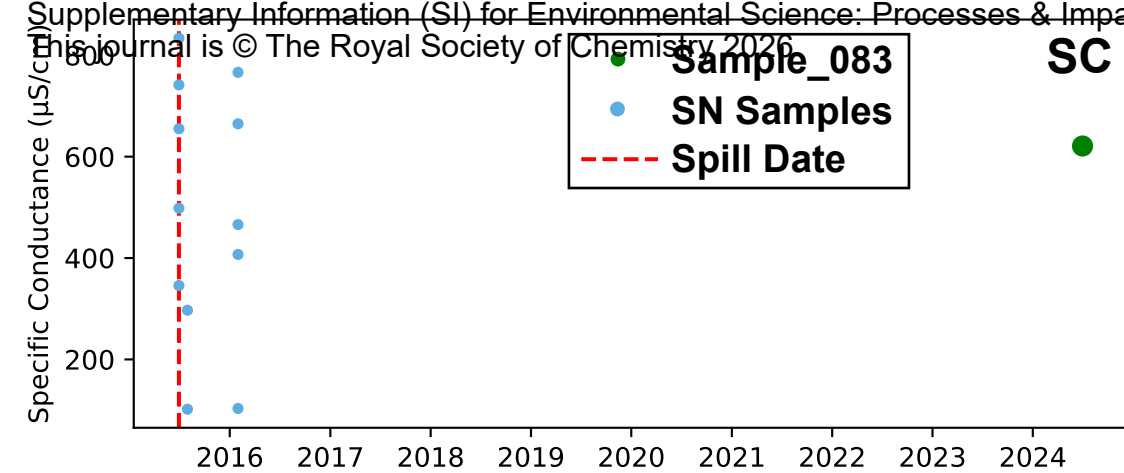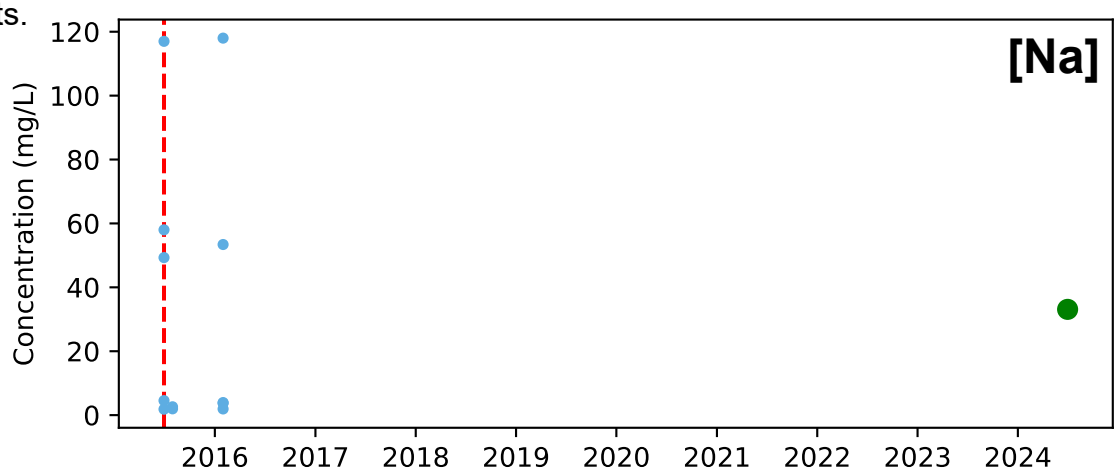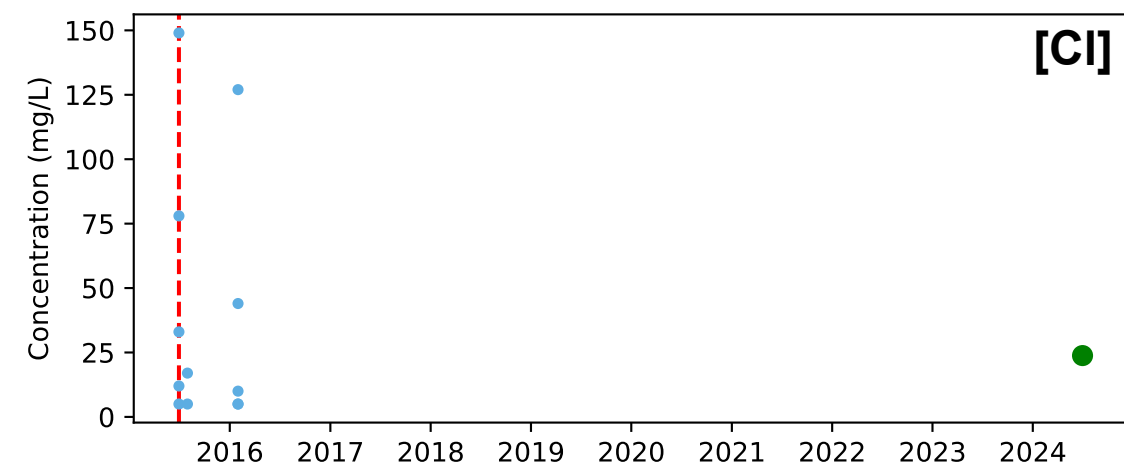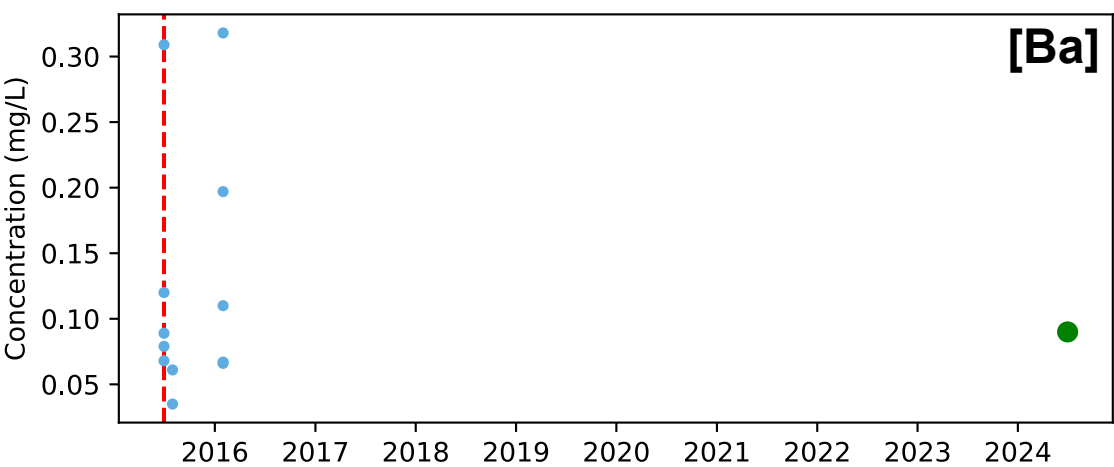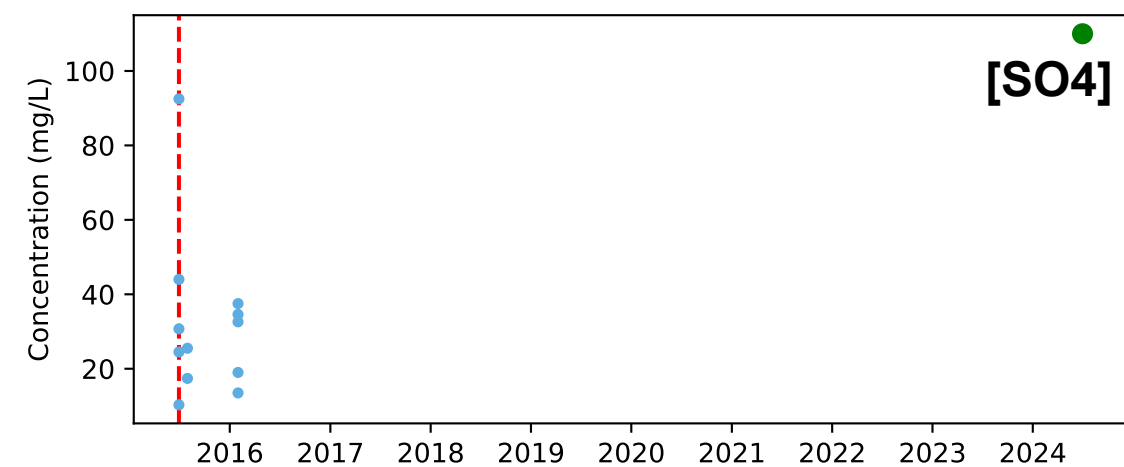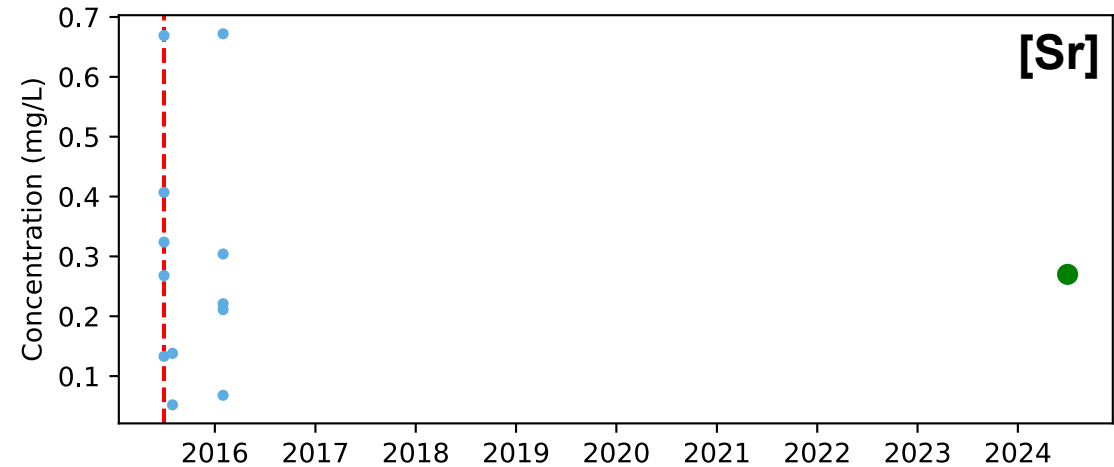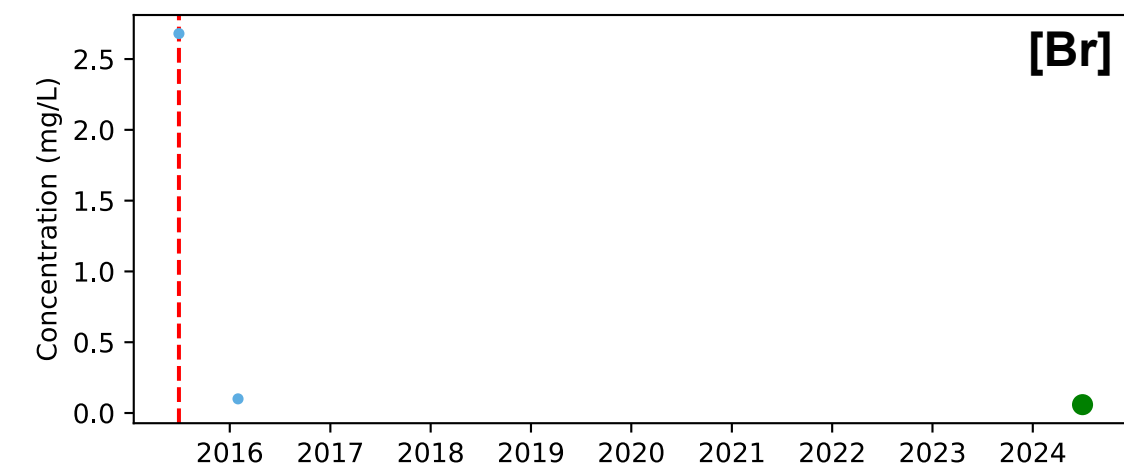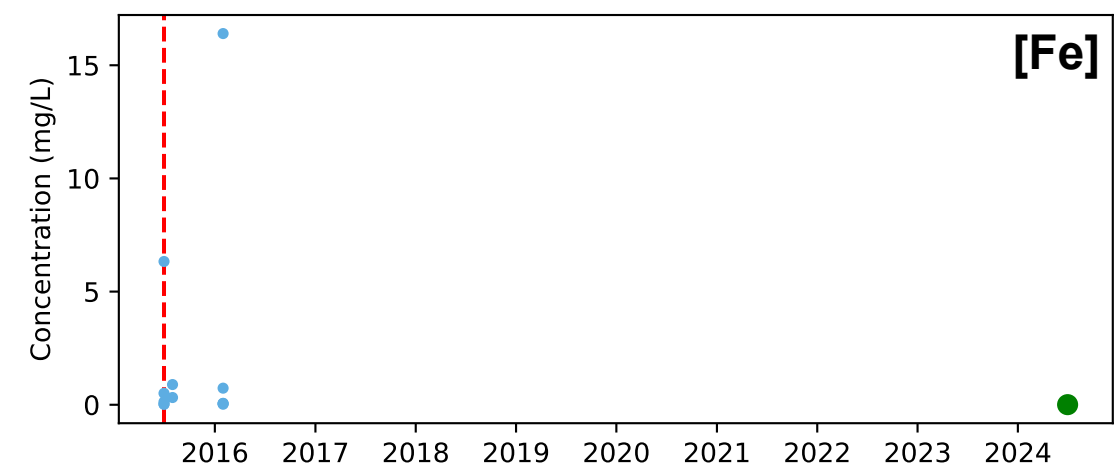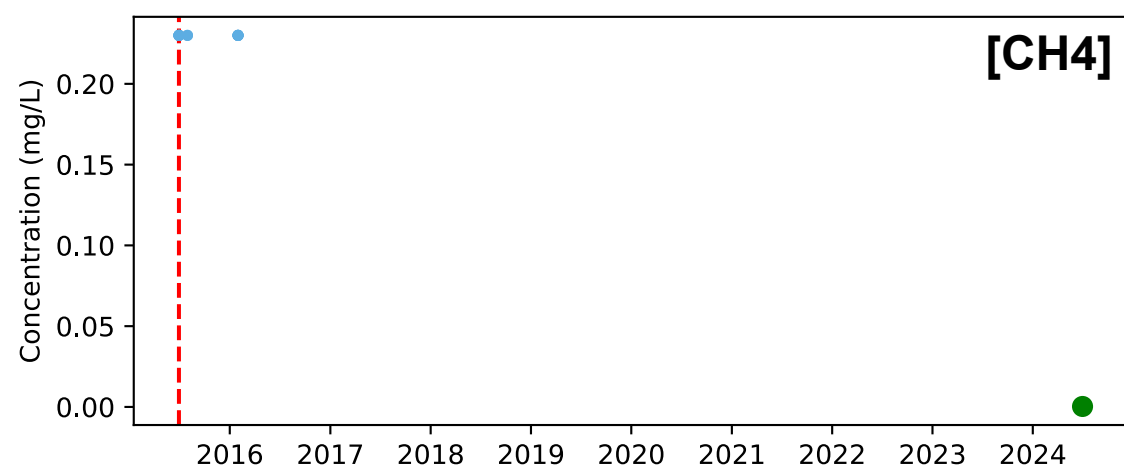

Supplement: d6em00142d7.pdf [file d6em00142d7.pdf]

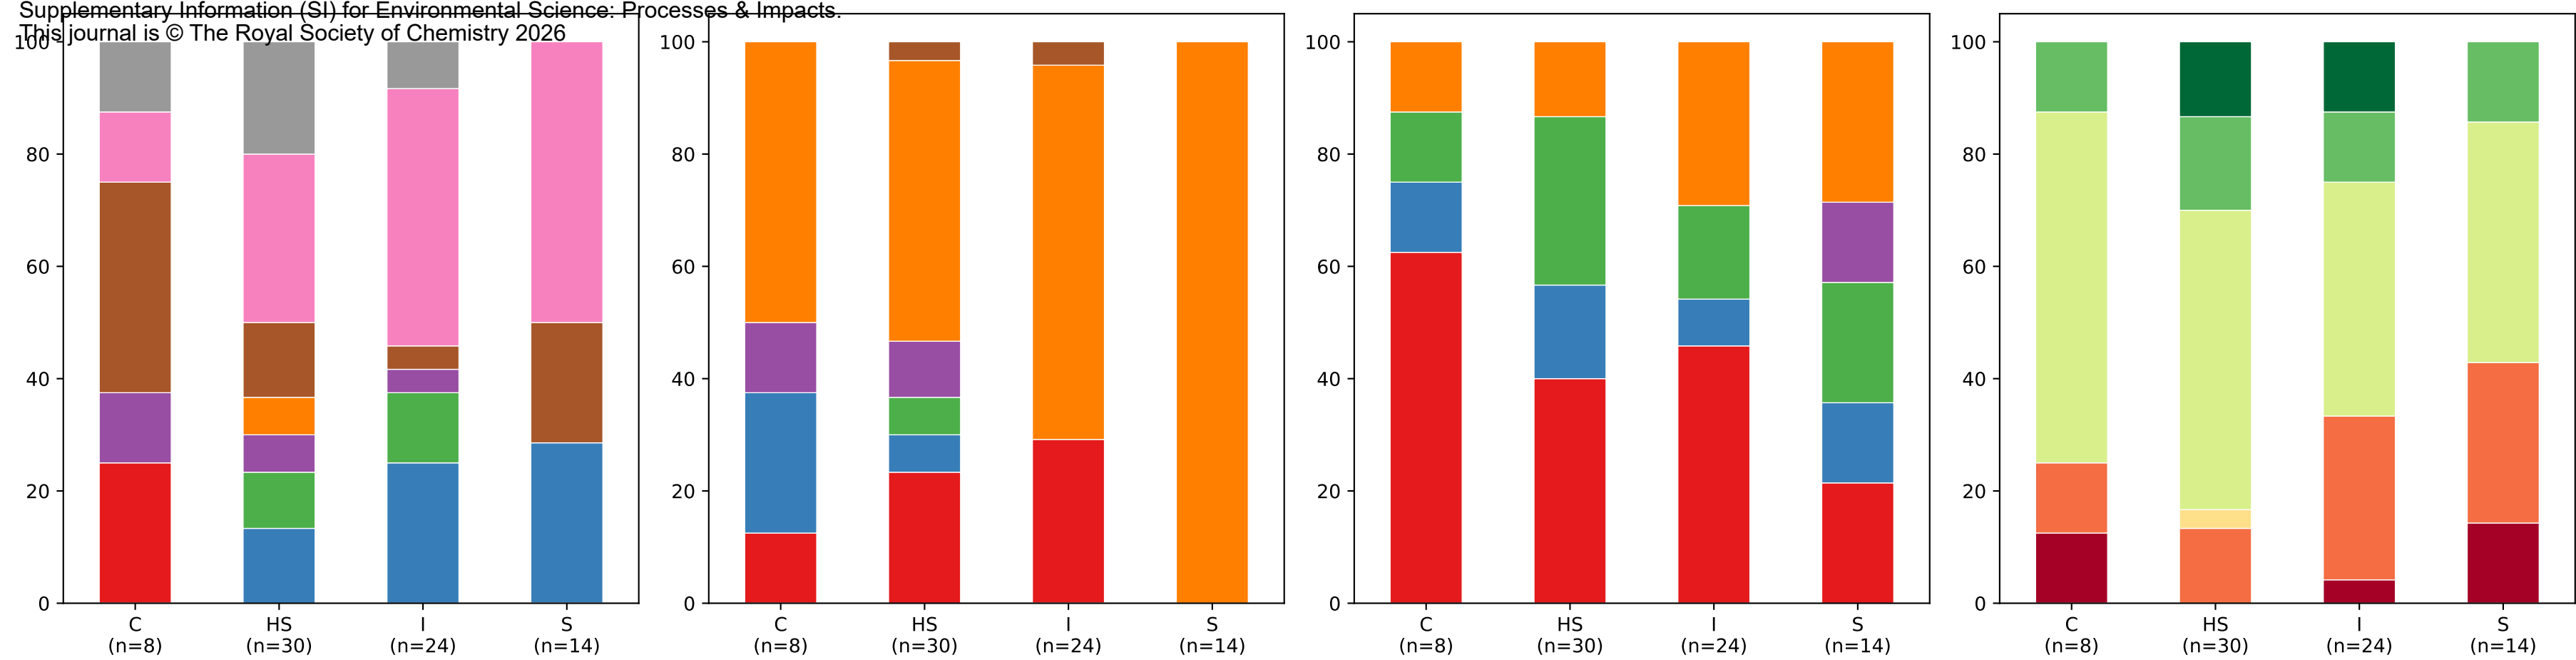

Supplement: d6em00142d8.pdf [file d6em00142d8.pdf]
